# Supplementary material for: Single Cell Genome Amplification Accelerates Identification of the Apratoxin Biosynthetic Pathway from a Complex Microbial Assemblage
Source: PLoS One. 2011 Apr 12;6(4):e18565. doi: 10.1371/journal.pone.0018565 (PMC3075265; doi:10.1371/journal.pone.0018565)
Supplement: Dataset S1 — BLAST analysis of the assembled and extended contig sequences (>2 kb) against the SILVA 16S rRNA database [71] revealed Lyngbya as the only 16S rRNA gene sequence present in the in silico contig library. (XLS) [file pone.0018565.s013.xls]

## Sheet: Multi BLAST (1197 sequences)
Query	Lowest E-value	Number of hits	Greatest hit length	Description positive %
contig03402	0	505	1211	DQ889932.1.1482 Bacteria;Cyanobacteria;SubsectionIII;Lyngbya
1688	4.59158e-08	4	36	DQ314768.1.1513 Bacteria;Proteobacteria;Gammaproteobacteria;Enterobacteriales;Enterobacteriaceae;Candidatus Riesia
2452	4.59158e-08	4	36	DQ314768.1.1513 Bacteria;Proteobacteria;Gammaproteobacteria;Enterobacteriales;Enterobacteriaceae;Candidatus Riesia
4311	4.09988e-05	4	31	AY684084.1.1597 Bacteria;Firmicutes;Clostridia;Thermoanerobacterales;Thermoanaerobacteraceae;Moorella
17177	4.09988e-05	4	31	AY684084.1.1597 Bacteria;Firmicutes;Clostridia;Thermoanerobacterales;Thermoanaerobacteraceae;Moorella
9235	4.30971e-05	3	31	AY684084.1.1597 Bacteria;Firmicutes;Clostridia;Thermoanerobacterales;Thermoanaerobacteraceae;Moorella
9401	4.30971e-05	3	31	AY684084.1.1597 Bacteria;Firmicutes;Clostridia;Thermoanerobacterales;Thermoanaerobacteraceae;Moorella
contig04124	4.41462e-05	3	31	AY684084.1.1597 Bacteria;Firmicutes;Clostridia;Thermoanerobacterales;Thermoanaerobacteraceae;Moorella
contig05135	5.21485e-05	6	31	X88896.1421.2824 Bacteria;Proteobacteria;Alphaproteobacteria;Rickettsiales;mitochondria
contig04763	5.37325e-05	5	31	AY684084.1.1597 Bacteria;Firmicutes;Clostridia;Thermoanerobacterales;Thermoanaerobacteraceae;Moorella
contig	0.000103249	21	30	AB100482.1.1457 Bacteria;Firmicutes;Clostridia;Clostridiales;Ruminococcaceae;uncultured
contig06423	0.000196141	4	30	AY684084.1.1597 Bacteria;Firmicutes;Clostridia;Thermoanerobacterales;Thermoanaerobacteraceae;Moorella
10339	0.000290229	18	31	DQ834016.1.1117 Archaea;Euryarchaeota;Thermoplasmata;Thermoplasmatales;A10
18200	0.000290229	18	31	DQ834016.1.1117 Archaea;Euryarchaeota;Thermoplasmata;Thermoplasmatales;A10
contig05029	0.000313704	37	54	FJ196314.1.2284 Bacteria;Proteobacteria;Alphaproteobacteria;Rhizobiales;Candidatus Liberibacter
2559	0.000347495	5	30	EU721812.1.1484 Bacteria;Candidate division OP9
4666	0.000347495	5	30	EU721812.1.1484 Bacteria;Candidate division OP9
615	0.000362116	66	73	DQ153089.1.1648 Bacteria;Proteobacteria;Gammaproteobacteria;Pseudomonadales;Moraxellaceae;Moraxella
8047	0.000362116	66	73	DQ153089.1.1648 Bacteria;Proteobacteria;Gammaproteobacteria;Pseudomonadales;Moraxellaceae;Moraxella
contig03832	0.000392983	18	31	DQ834016.1.1117 Archaea;Euryarchaeota;Thermoplasmata;Thermoplasmatales;A10
8729	0.000435222	37	54	FJ196314.1.2284 Bacteria;Proteobacteria;Alphaproteobacteria;Rhizobiales;Candidatus Liberibacter
12840	0.000435222	37	54	FJ196314.1.2284 Bacteria;Proteobacteria;Alphaproteobacteria;Rhizobiales;Candidatus Liberibacter
contig03115	0.000524736	5	30	EU721812.1.1484 Bacteria;Candidate division OP9
contig00021	0.000558527	66	73	DQ153089.1.1648 Bacteria;Proteobacteria;Gammaproteobacteria;Pseudomonadales;Moraxellaceae;Moraxella
contig00249	0.000661327	8	29	EU721812.1.1484 Bacteria;Candidate division OP9
contig04230	0.000672328	4	30	AY684084.1.1597 Bacteria;Firmicutes;Clostridia;Thermoanerobacterales;Thermoanaerobacteraceae;Moorella
contig00877	0.000906394	8	28	AB100482.1.1457 Bacteria;Firmicutes;Clostridia;Clostridiales;Ruminococcaceae;uncultured
contig	0.00126896	5	34	AB100482.1.1457 Bacteria;Firmicutes;Clostridia;Clostridiales;Ruminococcaceae;uncultured
contig03960	0.00136057	6	26	AB100482.1.1457 Bacteria;Firmicutes;Clostridia;Clostridiales;Ruminococcaceae;uncultured
5097	0.00137276	2	29	D78649.1.1476 Bacteria;Firmicutes;Mollicutes;Mycoplasmatales;Mycoplasmataceae;Ureaplasma
12135	0.00137276	2	29	D78649.1.1476 Bacteria;Firmicutes;Mollicutes;Mycoplasmatales;Mycoplasmataceae;Ureaplasma
3769	0.00150339	8	28	AB100482.1.1457 Bacteria;Firmicutes;Clostridia;Clostridiales;Ruminococcaceae;uncultured
8791	0.00150339	8	28	AB100482.1.1457 Bacteria;Firmicutes;Clostridia;Clostridiales;Ruminococcaceae;uncultured
11425	0.00168763	13	49	EU478630.1.2261 Bacteria;Planctomycetes;028H05-P-BN-P5
12930	0.00168763	13	49	EU478630.1.2261 Bacteria;Planctomycetes;028H05-P-BN-P5
contig03932	0.00257508	3	24	DQ386151.1.1385 Bacteria;Planctomycetes;Candidatus Scalindua
10448	0.00270199	3	24	DQ386151.1.1385 Bacteria;Planctomycetes;Candidatus Scalindua
10753	0.00270199	3	24	DQ386151.1.1385 Bacteria;Planctomycetes;Candidatus Scalindua
contig05368	0.00309415	4	32	CU918132.1.1396 Bacteria;Candidate division OP9
contig04450	0.00309542	3	24	DQ230951.1.1561 Bacteria;Nitrospirae;Nitrospira;Nitrospirales;Nitrospiraceae;uncultured
194	0.00321345	3	32	EU721812.1.1484 Bacteria;Candidate division OP9
12590	0.00321345	3	32	EU721812.1.1484 Bacteria;Candidate division OP9
contig00425	0.00335686	3	32	EU721812.1.1484 Bacteria;Candidate division OP9
contig05074	0.00440336	3	28	DQ889872.1.1414 Bacteria;Proteobacteria;Alphaproteobacteria;Rhodobacterales;Rhodobacteraceae;uncultured
contig01479	0.00445662	29	25	GQ441288.1.1452 Bacteria;Cyanobacteria;SubsectionIII;Leptolyngbya
5613	0.00507299	318	24	AJ390458.1.1363 Bacteria;Candidate division WS3
13327	0.00507299	318	24	AJ390458.1.1363 Bacteria;Candidate division WS3
10310	0.00610281	3	28	DQ889872.1.1414 Bacteria;Proteobacteria;Alphaproteobacteria;Rhodobacterales;Rhodobacteraceae;uncultured
16370	0.00610281	3	28	DQ889872.1.1414 Bacteria;Proteobacteria;Alphaproteobacteria;Rhodobacterales;Rhodobacteraceae;uncultured
contig06394	0.00629558	3	28	AJ532421.1.2410 Eukaryota;Euglenozoa;Euglenida;Euglenales;Euglena;
684	0.00655304	3	28	AJ532421.1.2410 Eukaryota;Euglenozoa;Euglenida;Euglenales;Euglena;
8239	0.00655304	3	28	AJ532421.1.2410 Eukaryota;Euglenozoa;Euglenida;Euglenales;Euglena;
contig02955	0.00658347	318	24	AJ390458.1.1363 Bacteria;Candidate division WS3
13198	0.0108822	1	27	DQ643000.1.2192 Eukaryota;Metazoa;Platyhelminthes;Cestoda;Eucestoda;Cyclophyllidea;Mesocestoididae;Mesocestoides;
17696	0.0108822	1	27	DQ643000.1.2192 Eukaryota;Metazoa;Platyhelminthes;Cestoda;Eucestoda;Cyclophyllidea;Mesocestoididae;Mesocestoides;
contig00281	0.0136654	4	27	EU287797.1.1785 Eukaryota;Rhizaria;Polycystinea;environmental samples;
11531	0.0139111	2	27	DQ009428.1.2171 Bacteria;Proteobacteria;Deltaproteobacteria;SAR324 clade(Marine group B)
15517	0.0139111	2	27	DQ009428.1.2171 Bacteria;Proteobacteria;Deltaproteobacteria;SAR324 clade(Marine group B)
contig03940	0.0142622	3	27	AY684084.1.1597 Bacteria;Firmicutes;Clostridia;Thermoanerobacterales;Thermoanaerobacteraceae;Moorella
contig04440	0.014533	8	31	EU721812.1.1484 Bacteria;Candidate division OP9
1114	0.014538	3	27	AY684084.1.1597 Bacteria;Firmicutes;Clostridia;Thermoanerobacterales;Thermoanaerobacteraceae;Moorella
15863	0.014538	3	27	AY684084.1.1597 Bacteria;Firmicutes;Clostridia;Thermoanerobacterales;Thermoanaerobacteraceae;Moorella
1841	0.014874	3	27	AY684084.1.1597 Bacteria;Firmicutes;Clostridia;Thermoanerobacterales;Thermoanaerobacteraceae;Moorella
2470	0.014874	3	27	AY684084.1.1597 Bacteria;Firmicutes;Clostridia;Thermoanerobacterales;Thermoanaerobacteraceae;Moorella
1739	0.0158057	4	27	EU287797.1.1785 Eukaryota;Rhizaria;Polycystinea;environmental samples;
17116	0.0158057	4	27	EU287797.1.1785 Eukaryota;Rhizaria;Polycystinea;environmental samples;
contig04378	0.016362	1	23	EU774093.1.1293 Bacteria;Firmicutes;Clostridia;Clostridiales;Lachnospiraceae;Incertae Sedis
contig00176	0.018577	3	27	AY684084.1.1597 Bacteria;Firmicutes;Clostridia;Thermoanerobacterales;Thermoanaerobacteraceae;Moorella
contig00729	0.0268106	2	27	EU134487.1.1345 Bacteria;Proteobacteria;Deltaproteobacteria;Desulfobacterales;Nitrospinaceae;Candidatus Entotheonella
130	0.0397498	24	25	EF683065.1.1487 Bacteria;Bacteroidetes;Sphingobacteria;Sphingobacteriales;Chitinophagaceae;Segetibacter
17375	0.0397498	24	25	EF683065.1.1487 Bacteria;Bacteroidetes;Sphingobacteria;Sphingobacteriales;Chitinophagaceae;Segetibacter
contig03896	0.0419097	14	23	EU651861.1.1445 Bacteria;Firmicutes;Clostridia;Clostridiales;Peptococcaceae;Desulfotomaculum
11019	0.0419448	14	23	EU651861.1.1445 Bacteria;Firmicutes;Clostridia;Clostridiales;Peptococcaceae;Desulfotomaculum
16904	0.0419448	14	23	EU651861.1.1445 Bacteria;Firmicutes;Clostridia;Clostridiales;Peptococcaceae;Desulfotomaculum
9337	0.0435742	3	30	EU134969.1.1633 Bacteria;Candidate division OP11
16750	0.0435742	3	30	EU134969.1.1633 Bacteria;Candidate division OP11
contig03313	0.0441885	5	26	AB100489.1.1664 Bacteria;Firmicutes;Clostridia;Clostridiales;Ruminococcaceae;Papillibacter
contig03725	0.0447812	2	27	AY684084.1.1597 Bacteria;Firmicutes;Clostridia;Thermoanerobacterales;Thermoanaerobacteraceae;Moorella
3621	0.0477949	9	23	EF221772.1.1402 Bacteria;Proteobacteria;Gammaproteobacteria;Xanthomonadales;Xanthomonadaceae;Stenotrophomonas
5422	0.0477949	9	23	EF221772.1.1402 Bacteria;Proteobacteria;Gammaproteobacteria;Xanthomonadales;Xanthomonadaceae;Stenotrophomonas
16685	0.0481516	5	26	AB100489.1.1664 Bacteria;Firmicutes;Clostridia;Clostridiales;Ruminococcaceae;Papillibacter
16685	0.0481516	5	26	AB100489.1.1664 Bacteria;Firmicutes;Clostridia;Clostridiales;Ruminococcaceae;Papillibacter
contig00866	0.0514805	4	31	X93478.1.1473 Bacteria;Proteobacteria;Gammaproteobacteria;Chromatiales;Ectothiorhodospiraceae;Ectothiorhodospira
12247	0.0515598	1	22	EU381929.1.1518 Bacteria;Firmicutes;Mollicutes;RF9
13608	0.0515598	1	22	EU381929.1.1518 Bacteria;Firmicutes;Mollicutes;RF9
3887	0.0526298	273	22	U21492.1.1434 Bacteria;Cyanobacteria;Chloroplast
14872	0.0526298	273	22	U21492.1.1434 Bacteria;Cyanobacteria;Chloroplast
contig	0.053385	34	26	DQ386151.1.1385 Bacteria;Planctomycetes;Candidatus Scalindua
contig05875	0.0534026	1	22	AB301906.1.913 Archaea;Euryarchaeota;Thermoplasmata;Thermoplasmatales;Marine Group II
contig00217	0.0541358	3	30	AY684084.1.1597 Bacteria;Firmicutes;Clostridia;Thermoanerobacterales;Thermoanaerobacteraceae;Moorella
contig06256	0.0552455	3	34	GQ259314.1.1488 Bacteria;Verrucomicrobia;Verrucomicrobiae;Verrucomicrobiales;Verrucomicrobiaceae;Haloferula
contig03519	0.057128	75	26	FJ371314.1.1260 Bacteria;Firmicutes;Clostridia;Clostridiales;Lachnospiraceae
contig05736	0.0611307	5	26	EU491234.1.1527 Bacteria;Nitrospirae;Nitrospira;Nitrospirales;Nitrospiraceae;uncultured
contig00686	0.0638007	9	23	EF221772.1.1402 Bacteria;Proteobacteria;Gammaproteobacteria;Xanthomonadales;Xanthomonadaceae;Stenotrophomonas
contig04209	0.0651077	4	29	EU473676.1.1392 Bacteria;Bacteroidetes;Bacteroidia;Bacteroidales;BS11 gut group
contig04572	0.0657215	1	26	EU885056.1.1436 Bacteria;Lentisphaerae;Lentisphaeria;Victivallales;Victivallaceae;uncultured
6503	0.0720976	3	30	AY684084.1.1597 Bacteria;Firmicutes;Clostridia;Thermoanerobacterales;Thermoanaerobacteraceae;Moorella
18176	0.0720976	3	30	AY684084.1.1597 Bacteria;Firmicutes;Clostridia;Thermoanerobacterales;Thermoanaerobacteraceae;Moorella
5113	0.0731867	16	29	EU772153.1.1397 Bacteria;Bacteroidetes;Bacteroidia;Bacteroidales;Rikenellaceae;RC9 gut group
7254	0.0731867	16	29	EU772153.1.1397 Bacteria;Bacteroidetes;Bacteroidia;Bacteroidales;Rikenellaceae;RC9 gut group
12370	0.07685	9	30	AB100483.1.1397 Bacteria;Firmicutes;Clostridia;Clostridiales;Ruminococcaceae;uncultured
12813	0.07685	9	30	AB100483.1.1397 Bacteria;Firmicutes;Clostridia;Clostridiales;Ruminococcaceae;uncultured
contig01165	0.0809885	5	23	EU284797.1.1222 Archaea;Euryarchaeota;Methanobacteria;Methanobacteriales;Methanobacteriaceae;Methanobrevibacter
11854	0.0811865	8	29	AB100489.1.1664 Bacteria;Firmicutes;Clostridia;Clostridiales;Ruminococcaceae;Papillibacter
12579	0.0811865	8	29	AB100489.1.1664 Bacteria;Firmicutes;Clostridia;Clostridiales;Ruminococcaceae;Papillibacter
contig00213	0.0812856	7	25	GQ259243.1.1466 Bacteria;Proteobacteria;Gammaproteobacteria;endosymbionts
contig04313	0.081345	45	25	AY968205.1.1466 Bacteria;Bacteroidetes;Bacteroidia;Bacteroidales;Porphyromonadaceae;Porphyromonas
1663	0.0831667	7	25	GQ259243.1.1466 Bacteria;Proteobacteria;Gammaproteobacteria;endosymbionts
10175	0.0831667	7	25	GQ259243.1.1466 Bacteria;Proteobacteria;Gammaproteobacteria;endosymbionts
11775	0.093721	11	30	EU721812.1.1484 Bacteria;Candidate division OP9
15740	0.093721	11	30	EU721812.1.1484 Bacteria;Candidate division OP9
contig03755	0.0961962	11	30	EU721812.1.1484 Bacteria;Candidate division OP9
contig01260	0.100652	4	23	EF622795.1.2061 Eukaryota;Metazoa;Arthropoda;Hexapoda;Insecta;Pterygota;Neoptera;Plecoptera;Perloidea;Perlidae;Perlesta;
3227	0.105424	4	29	EU473676.1.1392 Bacteria;Bacteroidetes;Bacteroidia;Bacteroidales;BS11 gut group
16571	0.105424	4	29	EU473676.1.1392 Bacteria;Bacteroidetes;Bacteroidia;Bacteroidales;BS11 gut group
2401	0.106869	5	23	EU284797.1.1222 Archaea;Euryarchaeota;Methanobacteria;Methanobacteriales;Methanobacteriaceae;Methanobrevibacter
7736	0.106869	5	23	EU284797.1.1222 Archaea;Euryarchaeota;Methanobacteria;Methanobacteriales;Methanobacteriaceae;Methanobrevibacter
contig05774	0.120097	2	22	EU381929.1.1518 Bacteria;Firmicutes;Mollicutes;RF9
7491	0.130473	500	22	GU061104.1.1383 Bacteria;Proteobacteria;Alphaproteobacteria;Rhodobacterales;Rhodobacteraceae;uncultured
13360	0.130473	500	22	GU061104.1.1383 Bacteria;Proteobacteria;Alphaproteobacteria;Rhodobacterales;Rhodobacteraceae;uncultured
12850	0.131047	12	28	GQ084050.1.1371 Bacteria;Firmicutes;Bacilli;Bacillales;Staphylococcaceae;Staphylococcus
contig03144	0.135542	281	23	U21492.1.1434 Bacteria;Cyanobacteria;Chloroplast
contig04186	0.14873	17	29	EU772153.1.1397 Bacteria;Bacteroidetes;Bacteroidia;Bacteroidales;Rikenellaceae;RC9 gut group
contig06396	0.155187	3	21	FJ172827.1.1491 Bacteria;Firmicutes;Clostridia;Clostridiales;Lachnospiraceae;Butyrivibrio-Pseudobutyrivibrio
contig05850	0.158945	6	25	FJ604785.1.938 Archaea;Crenarchaeota;Group C3
contig06452	0.169779	2	22	AB100489.1.1664 Bacteria;Firmicutes;Clostridia;Clostridiales;Ruminococcaceae;Papillibacter
2276	0.170534	2	21	FJ172827.1.1491 Bacteria;Firmicutes;Clostridia;Clostridiales;Lachnospiraceae;Butyrivibrio-Pseudobutyrivibrio
9482	0.170534	2	21	FJ172827.1.1491 Bacteria;Firmicutes;Clostridia;Clostridiales;Lachnospiraceae;Butyrivibrio-Pseudobutyrivibrio
contig04083	0.174115	1	30	EU134969.1.1633 Bacteria;Candidate division OP11
485	0.191361	1	21	AB192177.1.1438 Bacteria;Firmicutes;Clostridia;Clostridiales;Ruminococcaceae;uncultured
12390	0.191361	1	21	AB192177.1.1438 Bacteria;Firmicutes;Clostridia;Clostridiales;Ruminococcaceae;uncultured
contig00288	0.191976	5	22	AY160807.1.1405 Bacteria;Firmicutes;Clostridia;Clostridiales;Ruminococcaceae;uncultured
5728	0.199034	14	25	GQ347844.1.1336 Bacteria;Proteobacteria;Alphaproteobacteria;OCS116 clade
14833	0.199034	14	25	GQ347844.1.1336 Bacteria;Proteobacteria;Alphaproteobacteria;OCS116 clade
contig04494	0.199034	1	21	AF082995.1.1717 Eukaryota;Metazoa;Nematoda;Chromadorea;Rhabditida;Rhabditoidea;Rhabditidae;Rhabditinae;Oscheius;
10603	0.199895	1	33	AB100482.1.1457 Bacteria;Firmicutes;Clostridia;Clostridiales;Ruminococcaceae;uncultured
12505	0.199895	1	33	AB100482.1.1457 Bacteria;Firmicutes;Clostridia;Clostridiales;Ruminococcaceae;uncultured
3404	0.202401	500	21	X60619.7.1431 Bacteria;Firmicutes;Bacilli;Bacillales;Paenibacillaceae;Paenibacillus
11938	0.202401	500	21	X60619.7.1431 Bacteria;Firmicutes;Bacilli;Bacillales;Paenibacillaceae;Paenibacillus
contig00549	0.20381	3	24	GQ377826.1.1270 Bacteria;Proteobacteria;Gammaproteobacteria;Alteromonadales;Alteromonadaceae;Alteromonas
contig	0.204491	8	28	GQ084050.1.1371 Bacteria;Firmicutes;Bacilli;Bacillales;Staphylococcaceae;Staphylococcus
contig04613	0.206159	5	29	AF097805.1.1438 Bacteria;Bacteroidetes;Sphingobacteria;Sphingobacteriales;PHOS-HE51
contig01072	0.20749	7	23	DQ009271.1.1976 Bacteria;Proteobacteria;Alphaproteobacteria;Rickettsiales;SAR116
contig03385	0.214929	1	21	DQ795231.1.1401 Bacteria;Firmicutes;Clostridia;Clostridiales;Lachnospiraceae;Incertae Sedis
11683	0.216651	23	23	EU133928.1.1341 Bacteria;Chloroflexi;S085
16790	0.216651	23	23	EU133928.1.1341 Bacteria;Chloroflexi;S085
contig00428	0.220488	1	25	DQ009459.1.2075 Bacteria;Deferribacteres;Unclassified Deferribacterales;SAR406 clade(Marine group A)
contig05216	0.229727	2	21	AY336742.1.1945 Eukaryota;Metazoa;Arthropoda;Myriapoda;Symphyla;Scutigerellidae;Scutigerella;
contig04225	0.229884	4	21	FM877687.1.2112 Eukaryota;Rhizaria;Foraminifera;Miliolina;Soritidae;Laevipeneroplis;
contig00684	0.230353	2	21	EU835447.1.1383 Bacteria;Proteobacteria;Alphaproteobacteria;Rickettsiales;Holosporaceae;Holospora
contig00404	0.235286	2	27	AY869684.1.1443 Bacteria;Chloroflexi;Anaerolineae;Anaerolineales;Anaerolineaceae;uncultured
contig05758	0.253822	2	25	EF666054.1.1426 Bacteria;Firmicutes;Mollicutes;Candidatus Phytoplasma
contig04589	0.264307	23	23	EU133928.1.1341 Bacteria;Chloroflexi;S085
5742	0.265324	1	21	DQ795231.1.1401 Bacteria;Firmicutes;Clostridia;Clostridiales;Lachnospiraceae;Incertae Sedis
8478	0.265324	1	21	DQ795231.1.1401 Bacteria;Firmicutes;Clostridia;Clostridiales;Lachnospiraceae;Incertae Sedis
contig01100	0.267827	1	21	EF526835.1.1369 Eukaryota;environmental samples;
6254	0.268923	2	25	EF432819.1.3579 Eukaryota;Fungi;Chytridiomycota;Chytridiomycetes;Lobulomycetales;
11879	0.268923	2	25	EF432819.1.3579 Eukaryota;Fungi;Chytridiomycota;Chytridiomycetes;Lobulomycetales;
contig05874	0.278077	2	29	EU537359.1.1396 Bacteria;Proteobacteria;Gammaproteobacteria;Pseudomonadales;Pseudomonadaceae;Pseudomonas
1637	0.279877	8	23	D11348.1.1636 Bacteria;Cyanobacteria;Chloroplast
6756	0.279877	8	23	D11348.1.1636 Bacteria;Cyanobacteria;Chloroplast
contig	0.28158	500	22	GU061104.1.1383 Bacteria;Proteobacteria;Alphaproteobacteria;Rhodobacterales;Rhodobacteraceae;uncultured
contig00572	0.28598	4	21	AY061997.1.3360 Eukaryota;Euglenozoa;Euglenida;Distigma;
11277	0.304132	6	25	EU134317.1.1381 Bacteria;Proteobacteria;Deltaproteobacteria;GR-WP33-30;uncultured
12737	0.304132	6	25	EU134317.1.1381 Bacteria;Proteobacteria;Deltaproteobacteria;GR-WP33-30;uncultured
contig04238	0.322676	4	25	EU765116.1.1363 Bacteria;Firmicutes;Clostridia;Clostridiales;Lachnospiraceae;Roseburia
contig04903	0.322989	14	25	GQ347844.1.1336 Bacteria;Proteobacteria;Alphaproteobacteria;OCS116 clade
contig01570	0.331518	2	25	FJ592922.1.1360 Bacteria;Candidate division OD1
7037	0.332457	6	25	EU519256.1.1051 Archaea;Euryarchaeota;Methanomicrobia;Methanocellales;Methanocellaceae;Rice Cluster I
10400	0.332457	6	25	EU519256.1.1051 Archaea;Euryarchaeota;Methanomicrobia;Methanocellales;Methanocellaceae;Rice Cluster I
11781	0.348653	236	23	FJ189562.1.1458 Bacteria;Proteobacteria;Epsilonproteobacteria;Campylobacterales;Helicobacteraceae;Sulfurovum
15268	0.348653	236	23	FJ189562.1.1458 Bacteria;Proteobacteria;Epsilonproteobacteria;Campylobacterales;Helicobacteraceae;Sulfurovum
contig00503	0.350374	1	29	GQ472380.1.1491 Bacteria;Bacteroidetes;Sphingobacteria;Sphingobacteriales;env.OPS 17
5123	0.36172	4	29	EU869383.1.1393 Bacteria;Firmicutes;Clostridia;Halanaerobiales;Halobacteroidaceae
18174	0.36172	4	29	EU869383.1.1393 Bacteria;Firmicutes;Clostridia;Halanaerobiales;Halobacteroidaceae
5100	0.362346	6	21	FJ792042.1.1356 Bacteria;Firmicutes;Clostridia;Clostridiales;Peptococcaceae;Desulfotomaculum
16198	0.362346	6	21	FJ792042.1.1356 Bacteria;Firmicutes;Clostridia;Clostridiales;Peptococcaceae;Desulfotomaculum
contig05204	0.364771	2	21	AJ488098.1.1511 Bacteria;Firmicutes;Clostridia;Clostridiales;Veillonellaceae;uncultured
254	0.368683	45	27	GQ921376.1.1491 Bacteria;Proteobacteria;Gammaproteobacteria;Chromatiales;Ectothiorhodospiraceae;uncultured
15192	0.368683	45	27	GQ921376.1.1491 Bacteria;Proteobacteria;Gammaproteobacteria;Chromatiales;Ectothiorhodospiraceae;uncultured
14402	0.371657	2	21	AJ488098.1.1511 Bacteria;Firmicutes;Clostridia;Clostridiales;Veillonellaceae;uncultured
17854	0.371657	2	21	AJ488098.1.1511 Bacteria;Firmicutes;Clostridia;Clostridiales;Veillonellaceae;uncultured
9028	0.373613	2	21	DQ069222.1.1477 Bacteria;Firmicutes;Clostridia;Clostridiales;Clostridiaceae;Oxobacter
11406	0.373613	2	21	DQ069222.1.1477 Bacteria;Firmicutes;Clostridia;Clostridiales;Clostridiaceae;Oxobacter
contig05957	0.376038	1	25	EU693512.1.1224 Bacteria;Firmicutes;Bacilli;Bacillales;Bacillaceae;Bacillus
2795	0.385897	1	29	AY355298.1.1500 Bacteria;Bacteroidetes;Flavobacteria;Flavobacteriales;Flavobacteriaceae;Tenacibaculum
10824	0.385897	1	29	AY355298.1.1500 Bacteria;Bacteroidetes;Flavobacteria;Flavobacteriales;Flavobacteriaceae;Tenacibaculum
6101	0.410778	9	23	DQ009271.1.1976 Bacteria;Proteobacteria;Alphaproteobacteria;Rickettsiales;SAR116
17272	0.410778	9	23	DQ009271.1.1976 Bacteria;Proteobacteria;Alphaproteobacteria;Rickettsiales;SAR116
contig04716	0.447475	2	21	AF239230.1.2493 Eukaryota;Amoebozoa;Mycetozoa;Myxogastria;Myxogastromycetidae;Physariida;Didymium;
contig04403	0.458585	1	21	AB211073.1.2010 Eukaryota;Metazoa;Chordata;Tunicata;Ascidiacea;Enterogona;Aplousobranchia;Didemnidae;Didemnum;
contig01301	0.463827	1	21	AB100483.1.1397 Bacteria;Firmicutes;Clostridia;Clostridiales;Ruminococcaceae;uncultured
contig06434	0.492934	236	23	FJ189562.1.1458 Bacteria;Proteobacteria;Epsilonproteobacteria;Campylobacterales;Helicobacteraceae;Sulfurovum
contig00863	0.501697	8	23	FJ802175.1.1242 Bacteria;Proteobacteria;Betaproteobacteria;Hydrogenophilales;Hydrogenophilaceae;Tepidiphilus
536	0.510382	8	23	FJ802175.1.1242 Bacteria;Proteobacteria;Betaproteobacteria;Hydrogenophilales;Hydrogenophilaceae;Tepidiphilus
12915	0.510382	8	23	FJ802175.1.1242 Bacteria;Proteobacteria;Betaproteobacteria;Hydrogenophilales;Hydrogenophilaceae;Tepidiphilus
contig04371	0.511243	45	27	GQ921376.1.1491 Bacteria;Proteobacteria;Gammaproteobacteria;Chromatiales;Ectothiorhodospiraceae;uncultured
contig01231	0.537611	43	21	AF299121.1.1419 Bacteria;Proteobacteria;Epsilonproteobacteria;Nautiliales;Nautiliaceae;Thioreductor
contig06455	0.556155	7	25	EU534562.1.1390 Bacteria;Firmicutes;Clostridia;Clostridiales;Lachnospiraceae;uncultured
contig03221	0.581114	1	33	AB100482.1.1457 Bacteria;Firmicutes;Clostridia;Clostridiales;Ruminococcaceae;uncultured
contig04203	0.601301	6	21	FJ792042.1.1356 Bacteria;Firmicutes;Clostridia;Clostridiales;Peptococcaceae;Desulfotomaculum
contig06370	0.615368	42	20	EU528223.1.1347 Bacteria;Gemmatimonadetes;Gemmatimonadetes;Gemmatimonadales;Gemmatimonadaceae;uncultured
3918	0.618771	1	20	AF013150.1.1798 Eukaryota;Metazoa;Platyhelminthes;Turbellaria;Seriata;Tricladida;Paludicola;Planariidae;Phagocata;
8472	0.618771	1	20	AF013150.1.1798 Eukaryota;Metazoa;Platyhelminthes;Turbellaria;Seriata;Tricladida;Paludicola;Planariidae;Phagocata;
contig04682	0.619699	500	24	EF209018.1.1703 Eukaryota;stramenopiles;Blastocystis;
4821	0.622793	3	20	EU157723.1.1444 Bacteria;Firmicutes;Bacilli;Bacillales;Paenibacillaceae;Paenibacillus
5184	0.622793	3	20	EU157723.1.1444 Bacteria;Firmicutes;Bacilli;Bacillales;Paenibacillaceae;Paenibacillus
3670	0.625887	17	22	EU503653.1.1385 Bacteria;Firmicutes;Erysipelotrichi;Erysipelotrichales;Erysipelotrichaceae;Allobaculum
13298	0.625887	17	22	EU503653.1.1385 Bacteria;Firmicutes;Erysipelotrichi;Erysipelotrichales;Erysipelotrichaceae;Allobaculum
4500	0.628671	15	23	EU488451.1.1493 Bacteria;Lentisphaerae;Lentisphaeria;Victivallales;Victivallaceae;uncultured
8051	0.628671	15	23	EU488451.1.1493 Bacteria;Lentisphaerae;Lentisphaeria;Victivallales;Victivallaceae;uncultured
6084	0.634085	7	21	GQ441294.1.1449 Bacteria;Bacteroidetes;Sphingobacteria;Sphingobacteriales;KD1-131
15305	0.634085	7	21	GQ441294.1.1449 Bacteria;Bacteroidetes;Sphingobacteria;Sphingobacteriales;KD1-131
contig04000	0.636097	4	26	AY753982.1.2138 Eukaryota;environmental samples;
contig00495	0.638076	67	33	FN428820.1.1367 Archaea;Crenarchaeota;Marine Benthic Group B
contig03834	0.641356	1	24	GQ379565.1.1243 Bacteria;Proteobacteria;Alphaproteobacteria;Caulobacterales;Caulobacteraceae;Phenylobacterium
contig04449	0.645069	52	27	X60630.7.1431 Bacteria;Firmicutes;Bacilli;Bacillales;Paenibacillaceae;Paenibacillus
contig00123	0.651257	7	23	GQ098350.1.1351 Bacteria;Proteobacteria;Betaproteobacteria;Burkholderiales;Comamonadaceae;uncultured
2660	0.652494	4	20	EU793784.1.1596 Eukaryota;Alveolata;Dinophyceae;Syndiniales;environmental samples;
4572	0.652494	4	20	EU793784.1.1596 Eukaryota;Alveolata;Dinophyceae;Syndiniales;environmental samples;
14116	0.65435	3	27	U01015.1.2062 Eukaryota;Euglenozoa;Kinetoplastida;Trypanosomatidae;Herpetomonas;
17531	0.65435	3	27	U01015.1.2062 Eukaryota;Euglenozoa;Kinetoplastida;Trypanosomatidae;Herpetomonas;
4348	0.65466	1	24	AY381217.1.1781 Eukaryota;environmental samples;
10723	0.65466	1	24	AY381217.1.1781 Eukaryota;environmental samples;
contig03249	0.672914	25	20	FM244869.1.1585 Eukaryota;Metazoa;Chordata;Tunicata;Appendicularia;Oikopleuridae;Oikopleura;
913	0.674151	1	24	GQ379565.1.1243 Bacteria;Proteobacteria;Alphaproteobacteria;Caulobacterales;Caulobacteraceae;Phenylobacterium
1125	0.674151	1	24	GQ379565.1.1243 Bacteria;Proteobacteria;Alphaproteobacteria;Caulobacterales;Caulobacteraceae;Phenylobacterium
contig00271	0.682814	1	20	AB237741.1.1408 Archaea;Euryarchaeota;Thermoplasmata;South African Goldmine Gp(SAGMEG)
contig04828	0.686508	1	25	AF211126.113.1628 Bacteria;Proteobacteria;Gammaproteobacteria;Enterobacteriales;Enterobacteriaceae;Candidatus Carsonella
contig05781	0.687455	19	23	U85902.1.1505 Bacteria;Proteobacteria;Gammaproteobacteria;Alteromonadales;Shewanellaceae;Shewanella
contig00688	0.688073	193	21	U81706.1.1432 Bacteria;Synergistetes;Synergistia;Synergistales;Synergistaceae;uncultured
8053	0.693333	3	24	FN428778.1.1531 Bacteria;Proteobacteria;Betaproteobacteria;Neisseriales;Neisseriaceae;Aquaspirillum
13785	0.693333	3	24	FN428778.1.1531 Bacteria;Proteobacteria;Betaproteobacteria;Neisseriales;Neisseriaceae;Aquaspirillum
contig00901	0.704471	4	31	EU461342.1.1379 Bacteria;Firmicutes;Clostridia;Clostridiales;Ruminococcaceae;uncultured
contig01313	0.70478	59	20	GQ421850.1.1410 Bacteria;Bacteroidetes;Sphingobacteria;Sphingobacteriales;Cytophagaceae;Adhaeribacter
contig03103	0.716537	16	28	GQ082206.1.1348 Bacteria;Firmicutes;Clostridia;Clostridiales;Family XI Incertae Sedis
3195	0.721797	14	23	FJ612371.1.1450 Bacteria;Cyanobacteria;SubsectionIII
16469	0.721797	14	23	FJ612371.1.1450 Bacteria;Cyanobacteria;SubsectionIII
contig05938	0.728603	1	20	AB509218.1.1449 Bacteria;Firmicutes;Clostridia;Clostridiales;Clostridiaceae;Clostridium
contig01077	0.73541	19	20	FJ906745.1.1430 Bacteria;Proteobacteria;Gammaproteobacteria;Alteromonadales;Idiomarinaceae;Pseudidiomarina
10591	0.738813	8	20	EF205442.1.1419 Bacteria;Bacteroidetes;SM1A07
11814	0.738813	8	20	EF205442.1.1419 Bacteria;Bacteroidetes;SM1A07
contig05146	0.740978	3	24	EF446229.1.937 Bacteria;Proteobacteria;Alphaproteobacteria;Rickettsiales;mitochondria
contig06425	0.741907	1	20	AY592406.1.1366 Bacteria;Candidate division OP9
16940	0.744072	2	24	FJ482176.1.1480 Bacteria;Candidate division OD1
contig04385	0.745	1	24	AM071380.1.1299 Bacteria;Proteobacteria;Deltaproteobacteria;Desulfuromonadales;Geobacteraceae;Geobacter
11336	0.746238	2	20	EU732005.1.1266 Archaea;Crenarchaeota;Marine Benthic Group B
16974	0.746238	2	20	EU732005.1.1266 Archaea;Crenarchaeota;Marine Benthic Group B
3066	0.746238	1	20	EU491234.1.1527 Bacteria;Nitrospirae;Nitrospira;Nitrospirales;Nitrospiraceae;uncultured
12399	0.746238	1	20	EU491234.1.1527 Bacteria;Nitrospirae;Nitrospira;Nitrospirales;Nitrospiraceae;uncultured
10350	0.749022	1	20	AB237741.1.1408 Archaea;Euryarchaeota;Thermoplasmata;South African Goldmine Gp(SAGMEG)
17173	0.749022	1	20	AB237741.1.1408 Archaea;Euryarchaeota;Thermoplasmata;South African Goldmine Gp(SAGMEG)
contig00712	0.754282	7	20	AB275004.1.1617 Eukaryota;environmental samples;
contig00991	0.757995	3	20	EF562231.1.1407 Bacteria;Proteobacteria;Betaproteobacteria;Burkholderiales;Burkholderiaceae;Ralstonia
2581	0.763873	1	20	EU050793.1.1413 Bacteria;Proteobacteria;Gammaproteobacteria;NKB5
9644	0.763873	1	20	EU050793.1.1413 Bacteria;Proteobacteria;Gammaproteobacteria;NKB5
1200	0.766039	1	20	FJ478707.1.1446 Bacteria;Chloroflexi;Ktedonobacter
1280	0.766039	1	20	FJ478707.1.1446 Bacteria;Chloroflexi;Ktedonobacter
contig06265	0.771917	6	28	EU775186.1.1374 Bacteria;Firmicutes;Clostridia;Clostridiales;Ruminococcaceae;uncultured
335	0.776867	1	20	EF675599.1.2088 Eukaryota;Amoebozoa;Flabellinea;Dactylopodida;Vexilliferidae;Neoparamoeba;
2943	0.776867	1	20	EF675599.1.2088 Eukaryota;Amoebozoa;Flabellinea;Dactylopodida;Vexilliferidae;Neoparamoeba;
contig03910	0.777486	18	28	GQ340293.1.1397 Bacteria;Bacteroidetes;Sphingobacteria;Sphingobacteriales;Chitinophagaceae;uncultured
contig01319	0.781199	2	20	FN554386.1.1273 Bacteria;Bacteroidetes;Sphingobacteria;Sphingobacteriales;Chitinophagaceae;uncultured
contig03482	0.781817	2	24	FJ485161.1.1273 Bacteria;Planctomycetes;Phycisphaerae;Phycisphaerales;Phycisphaeraceae;CL500-3
contig01157	0.789552	4	20	U29230.1.1372 Bacteria;Proteobacteria;Alphaproteobacteria;Rickettsiales;mitochondria
contig04446	0.796668	4	20	EU776913.1.1389 Bacteria;Firmicutes;Clostridia;Clostridiales;Lachnospiraceae;Incertae Sedis
561	0.797905	152	28	EU491234.1.1527 Bacteria;Nitrospirae;Nitrospira;Nitrospirales;Nitrospiraceae;uncultured
5167	0.797905	152	28	EU491234.1.1527 Bacteria;Nitrospirae;Nitrospira;Nitrospirales;Nitrospiraceae;uncultured
contig00095	0.798215	1	20	FJ205268.1.1509 Bacteria;Proteobacteria;Deltaproteobacteria;GR-WP33-30
contig03254	0.798834	1	20	DQ009184.1.1972 Bacteria;Proteobacteria;Alphaproteobacteria;SAR11 clade;Surface 1
14247	0.806568	1	20	EU491234.1.1527 Bacteria;Nitrospirae;Nitrospira;Nitrospirales;Nitrospiraceae;uncultured
16122	0.806568	1	20	EU491234.1.1527 Bacteria;Nitrospirae;Nitrospira;Nitrospirales;Nitrospiraceae;uncultured
contig03258	0.809353	6	20	AY883005.1.1744 Eukaryota;Alveolata;Dinophyceae;Gonyaulacales;Gonyaulacaceae;Alexandrium;
10966	0.81059	1	20	AF394528.1.1297 Eukaryota;Fungi;Microsporidia;Microsporidium;
5245	0.819562	1	20	EU245317.1.1452 Bacteria;Candidate division OD1
13206	0.819562	1	20	EU245317.1.1452 Bacteria;Candidate division OD1
6246	0.822347	3	28	EU779295.1.1390 Bacteria;Firmicutes;Clostridia;Clostridiales;Lachnospiraceae;Blautia
10229	0.822347	3	28	EU779295.1.1390 Bacteria;Firmicutes;Clostridia;Clostridiales;Lachnospiraceae;Blautia
contig00587	0.822656	1	20	AY557607.1.1836 Eukaryota;Metazoa;Mollusca;Bivalvia;Pteriomorphia;Pectinoida;Pectinoidea;Propeamussiidae;Parvamussium;
contig	0.823904	1	21	AY948376.1.1261 Bacteria;Bacteroidetes;Flavobacteria;Flavobacteriales;Flavobacteriaceae;Polaribacter
2986	0.829463	1	20	FJ807420.1.1316 Bacteria;Proteobacteria;Alphaproteobacteria;Rhizobiales;Bradyrhizobiaceae
4233	0.829463	1	20	FJ807420.1.1316 Bacteria;Proteobacteria;Alphaproteobacteria;Rhizobiales;Bradyrhizobiaceae
contig04419	0.845241	3	20	EU186025.1.1845 Eukaryota;Amoebozoa;Flabellinea;Flamella;
5338	0.874014	4	23	AB299551.1.1323 Bacteria;Proteobacteria;Alphaproteobacteria;Rhodospirillales;Rhodospirillaceae;Thalassospira
11888	0.874014	4	23	AB299551.1.1323 Bacteria;Proteobacteria;Alphaproteobacteria;Rhodospirillales;Rhodospirillaceae;Thalassospira
contig	0.877344	1	21	DQ069222.1.1477 Bacteria;Firmicutes;Clostridia;Clostridiales;Clostridiaceae;Oxobacter
contig06453	0.879274	4	23	AB299551.1.1323 Bacteria;Proteobacteria;Alphaproteobacteria;Rhodospirillales;Rhodospirillaceae;Thalassospira
contig05706	0.882986	2	23	AY862782.1.1419 Bacteria;Candidate division OD1
2437	0.889793	1	20	AY557607.1.1836 Eukaryota;Metazoa;Mollusca;Bivalvia;Pteriomorphia;Pectinoida;Pectinoidea;Propeamussiidae;Parvamussium;
4417	0.889793	1	20	AY557607.1.1836 Eukaryota;Metazoa;Mollusca;Bivalvia;Pteriomorphia;Pectinoida;Pectinoidea;Propeamussiidae;Parvamussium;
contig03240	0.893506	3	20	FJ368039.1.1387 Bacteria;Firmicutes;Clostridia;Clostridiales;Lachnospiraceae;Blautia
contig05807	0.903406	11	20	EU331036.1.1876 Eukaryota;Amoebozoa;Flabellinea;Dactylopodida;Vexilliferidae;Neoparamoeba;
12821	0.908356	1	20	EU779210.1.1407 Bacteria;Firmicutes;Clostridia;Clostridiales;Ruminococcaceae;uncultured
15681	0.908356	1	20	EU779210.1.1407 Bacteria;Firmicutes;Clostridia;Clostridiales;Ruminococcaceae;uncultured
contig04214	0.910831	15	20	GU001895.1.1502 Bacteria;Firmicutes;Bacilli;Bacillales;Bacillaceae;Bacillus
10949	0.912378	2	24	FJ790311.1.1732 Eukaryota;Metazoa;Cnidaria;Myxozoa;Myxosporea;Multivalvulida;Kudoidae;Kudoa;
15066	0.912378	2	24	FJ790311.1.1732 Eukaryota;Metazoa;Cnidaria;Myxozoa;Myxosporea;Multivalvulida;Kudoidae;Kudoa;
contig03845	0.917638	11	20	GQ340258.1.1396 Bacteria;Bacteroidetes;Sphingobacteria;Sphingobacteriales;Chitinophagaceae;Sediminibacterium
8091	0.92135	1	24	AY208972.1.1474 Archaea;Euryarchaeota;Halobacteria;Halobacteriales;Halobacteriaceae;Natrinema
13951	0.92135	1	24	AY208972.1.1474 Archaea;Euryarchaeota;Halobacteria;Halobacteriales;Halobacteriaceae;Natrinema
contig01218	0.922278	21	20	EF574862.1.1447 Bacteria;Cyanobacteria;Chloroplast
contig06326	0.922278	1	20	AF393602.1.1461 Bacteria;Cyanobacteria;Chloroplast
contig01425	0.929394	1	24	AY208972.1.1474 Archaea;Euryarchaeota;Halobacteria;Halobacteriales;Halobacteriaceae;Natrinema
contig00171	0.937129	7	20	AF513966.1.1472 Bacteria;Planctomycetes;Phycisphaerae;Phycisphaerales;Phycisphaeraceae;Phycisphaera
8950	0.937438	1	20	FJ612157.1.1417 Bacteria;Bacteroidetes;Flavobacteria;Flavobacteriales;Flavobacteriaceae;Flavobacterium
18227	0.937438	1	20	FJ612157.1.1417 Bacteria;Bacteroidetes;Flavobacteria;Flavobacteriales;Flavobacteriaceae;Flavobacterium
contig06013	0.940532	14	23	FJ612371.1.1450 Bacteria;Cyanobacteria;SubsectionIII
1559	0.942698	2	20	AF081590.1.2169 Eukaryota;Euglenozoa;Euglenida;Eutreptiales;Eutreptiella;
5453	0.942698	2	20	AF081590.1.2169 Eukaryota;Euglenozoa;Euglenida;Eutreptiales;Eutreptiella;
contig00333	0.943626	2	24	EF442994.1.1435 Bacteria;Proteobacteria;Deltaproteobacteria;Desulfobacterales;Desulfobacteraceae;Desulfotignum
contig	0.954919	7	21	GQ441294.1.1449 Bacteria;Bacteroidetes;Sphingobacteria;Sphingobacteriales;KD1-131
contig04210	0.955073	2	28	AY277583.1.1470 Archaea;Euryarchaeota;Halobacteria;Halobacteriales;Halobacteriaceae;Natrinema
14338	0.974811	21	20	EF574862.1.1447 Bacteria;Cyanobacteria;Chloroplast
18271	0.974811	21	20	EF574862.1.1447 Bacteria;Cyanobacteria;Chloroplast
8841	0.975429	16	28	GQ082206.1.1348 Bacteria;Firmicutes;Clostridia;Clostridiales;Family XI Incertae Sedis
12192	0.975429	16	28	GQ082206.1.1348 Bacteria;Firmicutes;Clostridia;Clostridiales;Family XI Incertae Sedis
12029	0.980067	1	20	X74139.1.1292 Bacteria;Proteobacteria;Alphaproteobacteria;Rhizobiales;Methylobacteriaceae;Methylobacterium
12589	0.980067	1	20	X74139.1.1292 Bacteria;Proteobacteria;Alphaproteobacteria;Rhizobiales;Methylobacteriaceae;Methylobacterium
contig01347	0.991197	1	20	EU050793.1.1413 Bacteria;Proteobacteria;Gammaproteobacteria;NKB5

## Sheet: Sheet1
Table S1. Deduced Functions of the Proteins in the apr Biosynthetic Gene Cluster
protein	size (aa)	catalytic domains	proposed function	sequence similarity	identity/similarity
ORF1	90	transposase	transposase	Cyanothece sp. ATCC 51142	34%, 49%
ORF2	45	hypothetical protein	unknown	Nostoc sp. PCC7120	57%, 65%
ORF3	61	transposase	transposase	Lyngbya sp. PCC8106	77%, 86%
AprA	1139	AR, MT, AT, MT, T	2, 2,-dimethyl propionyl synthase	BryX, Candidatus Endobugula sertula	41%, 58%
AprB	2828	KS, AT, KR, T, KS, AT, T, T	PKS	CurI, Lyngbya majuscula	58%, 74%
AprC	84	T	acyl carrier protein	CurB, Lyngbya majuscula	79%, 89%
AprD	408	KS	keto-acyl synthase	JamG, Lyngbya majuscula	74%, 85%
AprE	418	HMGCS-like	Hmg-CoA sythase	JamH, Lyngbya majuscula	84%, 92%
AprF	259	ECH1	dehydration	JamI, Lyngbya majuscula	79%, 89%
AprG	2943	ECH2, ER, KS, AT, MT, KR, T	PKS	JamJ, Lyngbya majuscula	67%, 79%
AprH	1177	Cy, A(cys), T	NRPS	CurF, Lyngbya majuscula	77%, 86%
AprI	1765	KS, AT, DH, MT, KR, T	PKS	JamJ, Lyngbya majuscula	58%, 73%
AprJ	2955	C, A(Tyr), MT, T, C, A(Ala), MT, T	NRPS	CrpC, Nostoc sp. ATCC 53789	56%, 71%
AprK	1264	C, A(Ile), MT, T	NRPS	BarG, Lyngbya majuscula	58%, 73%
AprL	2126	C, A(Pro), MT, T, C, A(hydroxy-AA)	NRPS, Heterocyclization	NosA, Nostoc sp. GSV224	45%, 61%
ORF4	77	hypothetical protein	unknown	N/A	N/A
ORF5	38	transposase	transposase	HctC, Lyngbya majuscula	84%, 89%
Gene functions were deduced using BLAST analysis. Abbreviations for catalytic domains are; A(aa specificity); adenylation, AR; adapter region, AT; acyltransferase, C; condensation, Cy; cyclization, DH; dehydratase, ECH; enoyl CoA hydratase, ER; enoyl reductase, HMGCS; 3-hydroxy-3-methyl-glutaryl-CoA synthase, NRPS; non-ribosomal peptide synthase, PKS; polyketide synthase, KR; ketoreductase, KS; k…
