# Supplementary material for: Single Cell Genome Amplification Accelerates Identification of the Apratoxin Biosynthetic Pathway from a Complex Microbial Assemblage
Source: PLoS One. 2011 Apr 12;6(4):e18565. doi: 10.1371/journal.pone.0018565 (PMC3075265; doi:10.1371/journal.pone.0018565)
Supplement: Text S2 — Metagenomic DNA isolation and library construction. (DOC) [file pone.0018565.s009.doc]

**Text S2 Metagenomic DNA isolation and library construction.** DNA from laboratory cultured *L. bouillonii* PNG/08/03/2001-10 was used for PCR amplification. The Wizard Kit (Promega, Madison, WI) was used to isolate genomic DNA according to manufacturer suggestions. High molecular weight (HMW) DNA from cultured PNG/08/03/2001-10 was used for library construction, as previously described . The HMW-DNA was end repaired, size selected, and ligated into the copy control fosmid vector pCC1FOS using protocols provided with CopyControlTM Fosmid Library Production Kit (Epicentre Biotechnologies, Madison, WI). Plasmid preparations were carried out using commercial kits (Qiagen, Santa Clarita, CA) and (FosmidMAX™ Epicentre Biotechnologies, Madison, WI). Other basic DNA manipulations, such as restriction digests and ligations, were performed using standard methods.
